# Supplementary material for: Prevalence and income-related equity in hypertension in rural China from 1991 to 2011: differences between self-reported and tested measures
Source: Springer Nature journal article supplement (doi:10.1186/s12913-019-4289-5), 2019-07-01
Supplement: MOESM1 [file 16872012]

Table S1 Subjects and new subjects of each year

| Year | Subjects | New subjects compared to last year (%) |
|------|----------|----------------------------------------|
| 1991 | 11119    | -                                      |
| 1993 | 10828    | 932 (8.6)                              |
| 1997 | 11891    | 4037 (33.95)                           |
| 2000 | 13324    | 3575 (26.83)                           |
| 2004 | 13194    | 2689 (20.38)                           |
| 2006 | 15922    | 4297 (26.99)                           |
| 2009 | 16313    | 3316 (20.33)                           |
| 2011 | 19722    | 5754 (29.18)                           |
