# Supplementary material for: Prevalence and income-related equity in hypertension in rural China from 1991 to 2011: differences between self-reported and tested measures
Source: Springer Nature journal article supplement (doi:10.1186/s12913-019-4289-5), 2019-07-01

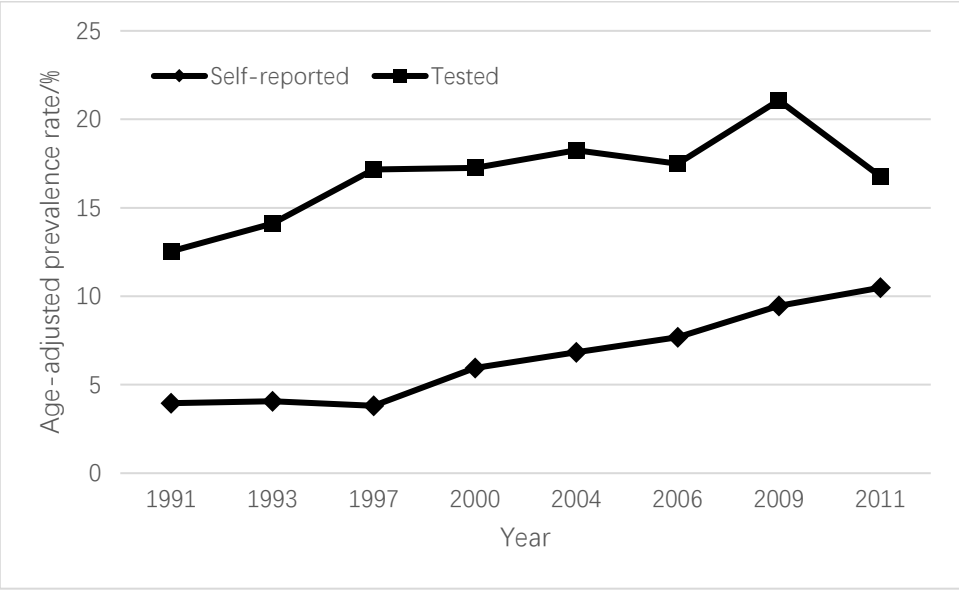

Supplement: MOESM2 [file 16872012]
