# Supplementary material for: Prevalence and income-related equity in hypertension in rural China from 1991 to 2011: differences between self-reported and tested measures
Source: Springer Nature journal article supplement (doi:10.1186/s12913-019-4289-5), 2019-07-01
Supplement: MOESM3 [file 16872012]

Table S2 The Chi2-Square test of prevalence of baseline subjects and new subjects

| Year | <i>p</i> values |
|------|-----------------|
| 1991 | -               |
| 1993 | 0.654           |
| 1997 | 0.002           |
| 2000 | 0.213           |
| 2004 | 0.209           |
| 2006 | 0.006           |
| 2009 | <0.001          |
| 2011 | 0.699           |
