# Supplementary material for: Prevalence and income-related equity in hypertension in rural China from 1991 to 2011: differences between self-reported and tested measures
Source: Springer Nature journal article supplement (doi:10.1186/s12913-019-4289-5), 2019-07-01
Supplement: MOESM4 [file 16872012]

|                                           | 1991                       |        |        |                     |        |        | 1993                       |        |        |                     |        |         | 1997                       |        |         |                     |        |         |
|-------------------------------------------|----------------------------|--------|--------|---------------------|--------|--------|----------------------------|--------|--------|---------------------|--------|---------|----------------------------|--------|---------|---------------------|--------|---------|
|                                           | Self-reported hypertension |        |        | Tested hypertension |        |        | Self-reported hypertension |        |        | Tested hypertension |        |         | Self-reported hypertension |        |         | Tested hypertension |        |         |
|                                           | dy/dx                      | C      | %      | dy/dx               | C      | %      | dy/dx                      | C      | %      | dy/dx               | C      | %       | dy/dx                      | C      | %       | dy/dx               | C      | %       |
| The poor                                  | -0.0002                    | -0.400 | 0.57   | -0.001              | -0.400 | 0.9    | 0.003                      | -0.400 | -5.96  | -0.016              | -0.400 | -352.30 | -0.005*                    | -0.400 | 25.17   | -0.016              | -0.400 | -101.40 |
| The middle                                | -0.001                     | 0.002  | 0.01   | 0.016               | 0.002  | 0.1    | 0.008                      | 0.0002 | 0.00   | -0.014              | 0.0001 | 1.33    | -0.003                     | 0.001  | -0.02   | -0.029*             | 0.001  | 0.25    |
| The richer                                | 0.004                      | 0.401  | 9.00   | 0.017               | 0.401  | 14.46  | 0.016***                   | 0.400  | 30.06  | -0.007              | 0.400  | 145.72  | -0.004                     | 0.400  | -22.56  | -0.032**            | 0.400  | 204.44  |
| The richest                               | 0.003                      | 0.800  | 15.16  | 0.020               | 0.800  | 32.61  | 0.014**                    | 0.800  | 49.33  | -0.004              | 0.800  | 179.47  | -0.0005                    | 0.800  | -4.55   | -0.021              | 0.800  | 265.18  |
| 46~59                                     | 0.025***                   | 0.040  | 5.72   | 0.102***            | 0.040  | 7.65   | 0.036***                   | 0.082  | 12.18  | 0.111***            | 0.082  | -457.63 | 0.031***                   | 0.096  | 38.20   | 0.130***            | 0.096  | -202.78 |
| 60 and above                              | 0.079***                   | -0.504 | -19.33 | 0.323***            | -0.050 | -26.58 | 0.108***                   | -0.075 | -30.31 | 0.276***            | -0.075 | 949.07  | 0.100***                   | -0.095 | -106.23 | 0.315***            | -0.095 | 425.82  |
| 18.5≤BMI<24                               | 0.004                      | -0.016 | -1.34  | 0.024**             | -0.016 | -2.81  | 0.002                      | -0.018 | -0.58  | 0.027*              | -0.018 | 95.01   | 0.007*                     | -0.033 | -9.44   | 0.058***            | -0.033 | 101.86  |
| 24≤BMI<28                                 | 0.028***                   | 0.104  | 14.06  | 0.166***            | 0.104  | 28.04  | 0.029***                   | 0.082  | 9.40   | 0.103***            | 0.082  | -414.58 | 0.034***                   | 0.110  | 48.93   | 0.206***            | 0.110  | -376.50 |
| BMI≥28                                    | 0.119***                   | 0.175  | 19.70  | 0.321***            | 0.175  | 17.80  | 0.139***                   | 0.101  | 10.00  | 0.242***            | 0.101  | -212.77 | 0.112***                   | 0.120  | 43.10   | 0.373***            | 0.120  | -181.84 |
| Primary and junior high school            | 0.005                      | 0.022  | 2.07   | 0.006               | 0.022  | 0.87   | 0.0001                     | 0.025  | 0.04   | 0.004               | 0.025  | -18.53  | 0.007**                    | 0.007  | 1.77    | -0.019              | 0.007  | 6.48    |
| High school or technical secondary school | -0.004                     | 0.117  | -1.87  | -0.022              | 0.117  | -3.58  | -0.003                     | 0.112  | -1.06  | -0.022              | 0.112  | 95.34   | -0.004                     | 107    | -4.67   | -0.046              | 0.107  | 65.51   |
| Junior college and above                  | 0.011                      | 0.224  | 1.82   | 0.003               | 0.224  | 2.0    | 0.003                      | 0.163  | 0.30   | -0.065*             | 0.016  | 76.60   |                            |        |         | -0.011              | 0.140  | 3.46    |
| Married                                   | 0.016**                    | 0.005  | 2.03   | 0.031**             | 0.005  | 1.32   | 0.005                      | -0.001 | -0.12  | 0.043***            | -0.001 | 12.62   | 0.009*                     | 0.0004 | 0.17    | 0.027               | 0.0004 | -0.70   |
| Other status                              | 0.050**                    | -0.079 | -8.21  | 0.068***            | -0.079 | -3.74  | 0.006                      | -0.085 | -0.85  | 0.110***            | -0.085 | 183.01  | 0.028**                    | -0.103 | -12.92  | 0.124***            | -0.103 | 72.38   |
| The middle region                         | -0.001                     | -0.017 | 0.21   | -0.018**            | -0.017 | 1.67   | 0.007**                    | -0.050 | -4.19  | -0.022**            | -0.050 | -162.71 | 0.004                      | -0.046 | -6.66   | -0.026**            | -0.046 | -58.72  |
| The western region                        | -0.008                     | -0.223 | 7.40   | -0.027**            | -0.223 | 8.63   | -0.009***                  | -0.113 | 3.24   | -0.058***           | -0.113 | -267.20 | -0.005                     | -0.205 | 9.44    | -0.083***           | -0.205 | -197.90 |
| Smoking                                   | -0.005                     | -0.006 | 0.31   | -0.008              | -0.006 | 1.66   | 0.001                      | 0.002  | 0.02   | 0.011               | 0.002  | -2.51   | 0.0002                     | -0.027 | -0.13   | 0.013               | -0.027 | 9.39    |
| Female                                    | -0.001                     | -0.003 | 0.03   | -0.034***           | -0.003 | 0.45   | -0.002                     | -0.008 | 0.23   | -0.037***           | -0.008 | -43.60  | 0.002                      | -0.002 | -0.12   | -0.057***           | -0.002 | -5.32   |
| Drinking                                  | 0.007                      | 0.103  | 2.41   | 0.046***            | 0.103  | 5.53   | 0.002                      | 0.142  | 0.65   | -0.0004             | 0.033  | 1.26    | -0.003                     | 0.096  | -2.29   | 0.013               | 0.096  | -13.29  |
| Having physical examination               | 0.060*                     | 0.220  | 4.21   | 0.194***            | 0.220  | 4.60   |                            |        |        | -0.030              | 0.211  | 16.39   | 0.093***                   | 0.092  | 4.86    | 0.021               | 0.092  | -1.38   |
| N                                         |                            | 5009   |        |                     | 5278   |        |                            | 5122   |        |                     | 5044   |         |                            | 5307   |         |                     | 5250   |         |
| R <sup>2</sup>                            |                            | 0.1501 |        |                     | 0.1919 |        |                            | 0.1855 |        |                     | 0.1335 |         |                            | 0.1953 |         |                     | 0.1487 |         |

\*, \*\*, \*\*\*: significantly different from zero at the 0.1, 0.05 and 0.01 level, respectively

|                                           | 2000          |        |         | 2004          |        |         | 2006          |        |        | 2009          |        |        |          |        |        |           |        |        |           |        |        |           |        |         |
|-------------------------------------------|---------------|--------|---------|---------------|--------|---------|---------------|--------|--------|---------------|--------|--------|----------|--------|--------|-----------|--------|--------|-----------|--------|--------|-----------|--------|---------|
|                                           | Self-reported |        | Tested  | Self-reported |        | Tested  | Self-reported |        | Tested | Self-reported |        | Tested |          |        |        |           |        |        |           |        |        |           |        |         |
|                                           | dy/dx         | C      | %       | dy/dx         | C      | %       | dy/dx         | C      | %      | dy/dx         | C      | %      |          |        |        |           |        |        |           |        |        |           |        |         |
| The poor                                  | -0.009        | -0.400 | 27.23   | -0.042**      | -0.400 | 175.42  | 0.003         | -0.400 | -3.22  | 0.021         | -0.399 | -26.55 | -0.002   | -0.400 | 1.38   | -0.014    | -0.400 | -18.58 | -0.012    | -0.400 | 13.02  | -0.026    | -0.400 | 130.58  |
| The middle                                | -0.007        | 0.0004 | 0.00    | -0.004        | 0.0005 | 0.00    | 0.017**       | 0.001  | 0.00   | 0.028*        | 0.001  | 0.01   | -0.001   | 0.001  | 0.000  | -0.022    | 0.001  | 0.04   | -0.009    | 0.000  | 0.00   | -0.021    | 0.000  | -0.04   |
| The richer                                | -0.006        | 0.400  | -16.12  | -0.030*       | 0.400  | -126.85 | 0.001         | 0.400  | 1.42   | 0.004         | 0.400  | 4.75   | 0.006    | 0.401  | 5.00   | -0.041**  | 0.401  | 53.22  | -0.004    | 0.400  | -4.80  | -0.012    | 0.400  | -60.83  |
| The richest                               | -0.004        | 0.800  | -24.81  | -0.019        | 0.800  | -158.74 | 0.015*        | 0.800  | 30.85  | 0.024         | 0.800  | 59.93  | 0.030*** | 0.800  | 50.62  | -0.008    | 0.800  | 21.99  | 0.019*    | 0.800  | 43.58  | -0.035*   | 0.800  | -352.78 |
| 46~59                                     | 0.056***      | 0.010  | 47.31   | 0.119***      | 0.010  | 142.17  | 0.091***      | 0.040  | 11.95  | 0.149***      | 0.040  | 23.65  | 0.090*** | 0.040  | 8.13   | 0.118***  | 0.040  | -16.45 | 0.119***  | 0.058  | 21.99  | 0.193***  | 0.058  | 162.23  |
| 60 and above                              | 0.172***      | -0.106 | -120.23 | 0.358***      | -0.106 | -357.69 | 0.211***      | -0.062 | -35.17 | 0.328***      | -0.062 | -66.27 | 0.224*** | -0.120 | -54.47 | 0.262***  | -0.120 | 97.68  | 0.252***  | -0.072 | -53.21 | 0.334***  | -0.072 | -321.36 |
| 18.5≤BMI<24                               | 0.012         | -0.043 | -11.56  | 0.051**       | -0.043 | -69.58  | 0.013         | -0.037 | -3.55  | -0.006        | -0.037 | 1.97   | 0.020*   | -0.032 | -3.78  | 0.064***  | -0.032 | 19.11  | 0.055***  | -0.025 | -10.61 | 0.074***  | -0.025 | -64.45  |
| 24≤BMI<28                                 | 0.065***      | 0.091  | 55.07   | 0.187***      | 0.091  | 225.25  | 0.062***      | 0.080  | 18.00  | 0.138***      | 0.080  | 48.21  | 0.067*** | 0.067  | 13.73  | 0.180***  | 0.067  | -56.36 | 0.143***  | 0.048  | 28.66  | 0.194***  | 0.048  | 177.52  |
| BMI≥28                                    | 0.174***      | 0.117  | 50.64   | 0.416***      | 0.112  | 172.96  | 0.183***      | 0.106  | 20.54  | 0.312***      | 0.106  | 42.23  | 0.217*** | 0.082  | 15.86  | 0.389***  | 0.082  | -43.70 | 0.289***  | 0.065  | 25.50  | 0.361***  | 0.065  | 144.69  |
| Primary and junior high school            | 0.008         | -0.008 | -1.46   | -0.019        | -0.008 | 5.03    | 0.005         | -0.032 | -1.40  | -0.027**      | -0.032 | 8.55   | 0.011*   | -0.034 | -2.19  | -0.066*** | -0.034 | -21.14 | 0.005     | -0.026 | -1.02  | -0.009    | -0.026 | 9.38    |
| High school or technical secondary school | 0.001         | 0.139  | 0.69    | -0.009        | 0.139  | -11.26  | 0.005         | 0.130  | 1.74   | -0.030        | 0.130  | -12.39 | 0.018*   | 0.152  | 6.00   | -0.097*** | 0.152  | 50.51  | -0.008    | 0.133  | -2.86  | -0.046**  | 0.133  | -75.51  |
| Junior college and above                  | -0.005        | 0.240  | -1.85   | 0.025         | 0.240  | 12.10   | -0.027*       | 0.259  | -4.41  | -0.043        | 0.259  | -8.70  | 0.033    | 0.256  | 5.82   | -0.128*** | 0.256  | 35.10  | -0.029    | 0.226  | -5.63  | -0.115*** | 0.226  | -102.45 |
| Married                                   | 0.015         | 0.004  | 1.73    | 0.036*        | 0.004  | 6.06    | 0.006         | 0.006  | 0.25   | 0.006         | 0.006  | 0.40   | 0.048**  | 0.004  | 1.77   | 0.071**   | 0.004  | -4.05  | 0.066**   | 0.012  | 9.49   | 0.060*    | 0.012  | 39.22   |
| Other status                              | 0.026         | -0.104 | -6.97   | 0.068**       | -0.104 | -26.00  | 0.017         | -0.091 | -1.77  | 0.060**       | -0.091 | -7.48  | 0.174**  | -0.119 | -20.49 | 0.136***  | -0.119 | 24.62  | 0.195***  | -0.133 | -37.33 | 0.141***  | -0.133 | -122.50 |
| The middle region                         | -0.007        | -0.109 | 15.6    | -0.024**      | -0.109 | 74.34   | -0.011*       | -0.092 | 7.22   | 0.001         | -0.092 | -1.03  | -0.03    | -0.068 | 1.21   | -0.009    | -0.068 | -5.75  | -0.013*   | -0.094 | 9.37   | -0.061*** | -0.094 | 206.80  |
| The western region                        | -0.023***     | -0.150 | 15.87   | -0.074***     | -0.150 | 72.97   | -0.014*       | -0.190 | 4.48   | -0.045***     | -0.190 | 16.82  | -0.018** | -0.132 | 3.45   | -0.061*** | -0.132 | -18.35 | -0.033*** | -0.125 | 7.83   | -0.092*** | -0.125 | 98.32   |
| Smoking                                   | -0.006        | -0.031 | 2.00    | 0.028         | -0.031 | -14.32  | -0.002        | 0.005  | 0.00   | -0.011        | 0.005  | -0.28  | 0.004    | 0.018  | 0.25   | -0.002    | 0.018  | 0.23   | 0.010     | -0.001 | -0.04  | -0.019    | -0.001 | 0.36    |
| Female                                    | 0.007         | -0.001 | 0.00    | -0.027**      | -0.001 | 0.50    | 0.007         | -0.011 | -0.54  | -0.080***     | -0.011 | 7.12   | 0.008    | -0.017 | -0.77  | -0.066*** | -0.017 | -9.73  | 0.015*    | -0.018 | -1.95  | -0.074*** | -0.018 | 45.37   |
| Drinking                                  | 0.004         | 0.079  | 1.44    | 0.034**       | 0.079  | 15.92   | 0.011         | 0.069  | 1.10   | 0.028*        | 0.069  | 3.41   | -0.002   | 0.075  | -0.16  | 0.038**   | 0.075  | -4.14  | -0.011    | 0.197  | -2.60  | 0.010     | 0.197  | 10.17   |
| Having physical examination               | 0.070*        | 0.188  | 4.00    | 0.038         | 0.188  | 3.07    | 0.094***      | 0.310  | 13.11  | 0.069**       | 0.310  | 11.66  | 0.046*** | 0.104  | 1.69   | 0.023     | 0.104  | -1.33  | 0.110***  | 0.169  | 10.44  | 0.059*    | 0.169  | 25.45   |
| N                                         | 5205          |        |         | 5248          |        |         | 6118          |        |        | 5910          |        |        | 6042     |        |        | 5909      |        |        | 6396      |        |        | 5594      |        |         |
| R <sup>2</sup>                            | 0.1750        |        |         | 0.1481        |        |         | 0.1857        |        |        | 0.1387        |        |        | 0.1871   |        |        | 0.1313    |        |        | 0.1800    |        |        | 0.1324    |        |         |

\*, \*\*, \*\*\*: significantly different from zero at the 0.1, 0.05 and 0.01 level, respectively
