# Supplementary material for: Prevalence and income-related equity in hypertension in rural China from 1991 to 2011: differences between self-reported and tested measures
Source: Springer Nature journal article supplement (doi:10.1186/s12913-019-4289-5), 2019-07-01
Supplement: MOESM5 [file 16872012]

Table S5 Concentration index of tested hypertension prevalence

| Year | Baseline subjects |        |        | Total subjects |        |        |
|------|-------------------|--------|--------|----------------|--------|--------|
|      | <i>C</i>          | 95% CI |        | <i>C</i>       | 95% CI |        |
| 1991 | 0.088             | 0.024  | 0.112  | 0.088          | 0.024  | 0.112  |
| 1993 | -0.032            | -0.066 | 0.003  | -0.003         | -0.004 | 0.037  |
| 1997 | -0.068            | -0.109 | -0.027 | -0.008         | -0.060 | 0.005  |
| 2000 | -0.010            | -0.041 | 0.022  | 0.010          | -0.032 | 0.028  |
| 2004 | 0.040             | 0.010  | 0.070  | 0.031          | -0.023 | 0.034  |
| 2006 | 0.0002            | -0.030 | 0.030  | -0.030         | -0.061 | -0.004 |
| 2009 | 0.040             | 0.011  | 0.070  | 0.006          | -0.035 | 0.017  |
| 2011 | -0.020            | -0.053 | 0.135  | -0.024         | -0.038 | 0.009  |
